# Supplementary material
Source: Elsevier journal article supplement (https://www.sciencedirect.com/science/article/pii/S1885585724001282)
Supplement: mmc1 [file mmc1.pdf]

**SUPPLEMENTARY DATA**

**Figure 1 of the supplementary data.** Flowchart of the study cohort.

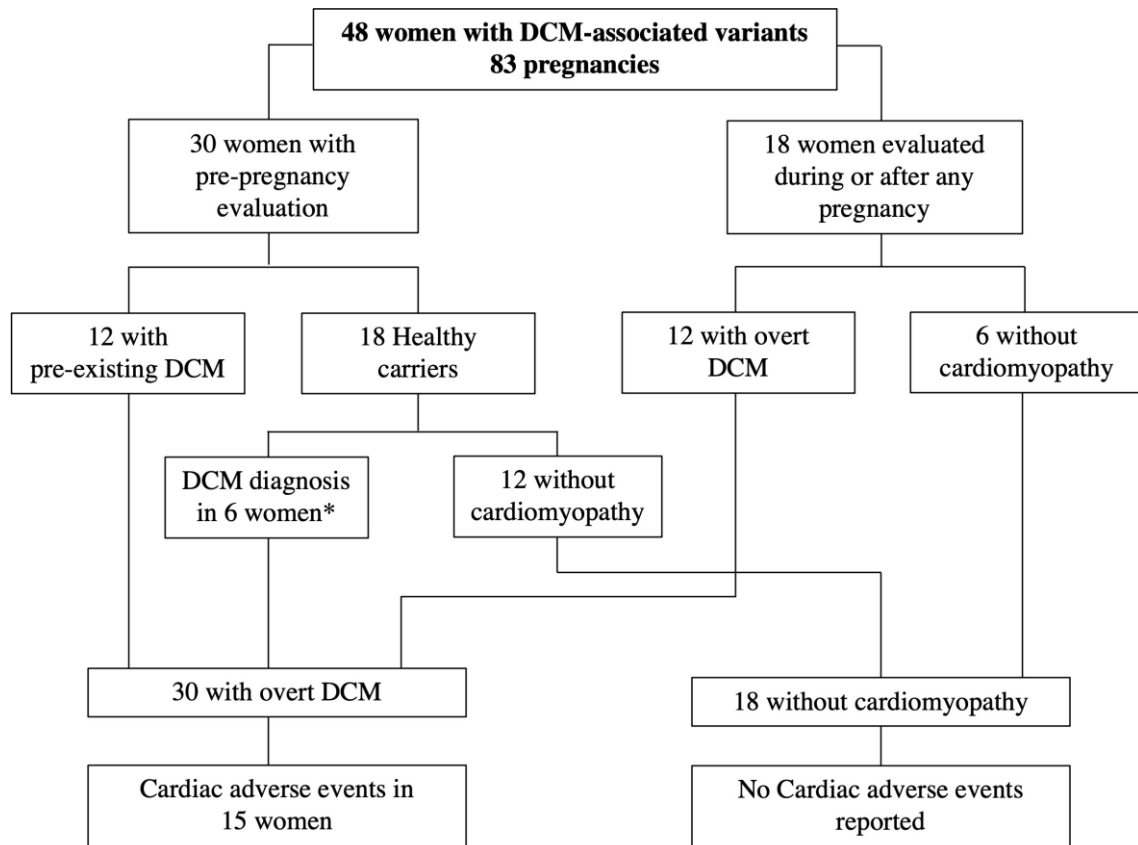

DCM, dilated cardiomyopathy. \* In 3 women, DCM diagnosis was established at the end of their first pregnancy, all with heart failure symptoms. Adverse cardiac events were defined as any of the following: HF symptoms requiring the use of intravenous diuretics, sustained ventricular tachycardia (SVT), appropriate implantable cardioverter-defibrillator (ICD) shock, left ventricular assist device (LVAD) implantation, heart transplant, and maternal cardiac death during pregnancy, or labor and delivery, and up to 6 months postpartum.

**Table 1 of the supplementary data.** DCM-associated variants identified in 48 women

| Gene   | Nucleotide Change        | Amino Acid Change         | No. |
|--------|--------------------------|---------------------------|-----|
| BAG3   | c.508_1728del            | Deletion of exons 3 and 4 | 1   |
| BAG3   | c.1353C>A                | p.Tyr451*                 | 3   |
| BAG3   | c.382_383insAG           | p.Ala128GluFs*84          | 1   |
| BAG3   | c.1360G>A                | p.Glu455Lys               | 1   |
| DMD    | c.7099-9829_7543-1206del | p.Glu2367_Lys2514del      | 1   |
| DSP    | c.7773_7776del           | p.Ser2591Argfs*11         | 1   |
| DSP    | c.7139delC               | p.Pro2380Glnfs*11         | 1   |
| DSP    | c.1891C>T                | p.Gln631*                 | 1   |
| DSP    | c.2390_2393delTCTG       | p.val797Alafs*14          | 1   |
| DSP    | c.3640_3641delAT         | p.Ile1214*                | 1   |
| LMNA   | c.575A>G                 | p.Asp192Gly               | 1   |
| LMNA   | c.1292C>G                | p.Ser431*                 | 1   |
| LMNA   | c.1526CdupC              | p.Thr510Tyrfs*42          | 1   |
| LMNA   | c.961C>T                 | p.Arg321*                 | 1   |
| LMNA   | c.1130G>A                | p.Arg377His               | 1   |
| LMNA   | c.240delC                | p.Tyr81Thrfs*15           | 1   |
| MYBPC3 | c.2512G>C                | p.Glu838Gln               | 1   |
| MYH7   | c.2729A>G                | p.Lys910Arg               | 1   |
| MYH7   | c.1106G>A                | p.Arg369Gln               | 2   |
| MYH7   | c.4333A>G                | p.Lys1445Glu              | 1   |
| RBM20  | c.1900C>T                | p.Arg634Trp               | 1   |
| RBM20  | c.1913C>T                | p.Pro638Leu               | 1   |
| RBM20  | c.2283delG               | p.Arg761?                 | 1   |
| RBM20  | c.2731G>A                | p.Val911Met               | 1   |
| SCN5A  | c.253G>A                 | p.Leu828Phe               | 1   |
| TPM1   | c.337C>G                 | p.Leu113Val               | 1   |
| TNNT2  | c.416G>A                 | p.Arg139His               | 1   |
| TTN    | c.25655C>A               | p.Ser8552*                | 1   |
| TTN    | c.70497_40498insT        | p.Leu23499fs              | 1   |
| TTN    | c.4824_0G>A              | p.Trp16080*               | 1   |
| TTN    | c.59365delG              | p.Val19789Cysfs*4         | 1   |
| TTN    | c.67813C>T               | p.Arg22605*               | 1   |
| TTN    | c.52699delG              | p.Glu17567Asnfs*12        | 1   |
| TTN    | c.11655_11656delAA       | p.Arg3886fs*20            | 3   |
| TTN    | c.53704_53705del         | p.Val17902fs              | 2   |
| TTN    | c.80790delG              | p.Trp26930Cysfs*16        | 1   |
| TTN    | c.12107delC              | p.4036Glnfs*14            | 1   |
| TTN    | c.73377delT              | p.Arg24461GluFs*18        | 1   |
| TTN    | c.89273A>T               | p.Lys26425                | 1   |
| TTN    | c.66086delG              | p.Gly22029GluFs*22        | 1   |
| TTN    | c.64417dupG              | p.Val21473Gly?            | 1   |
| TTN    | c.82608delT              | p. Gly27537Alafs*43       | 1   |

DCM, dilated cardiomyopathy

**Table 2 of the supplementary data**

Obstetric and fetal outcomes

|                                            | Pregnancies, No. (%) |                           | P   |
|--------------------------------------------|----------------------|---------------------------|-----|
|                                            | DCM (n = 48)         | Healthy carriers (n = 35) |     |
| <i>Obstetric complications</i>             |                      |                           |     |
| Total events                               | 5 (10)               | 1 (3)                     | .38 |
| Postpartum hemorrhage                      | 4 (8)                | 1 (3)                     |     |
| Pre-eclampsia                              | 1 (2)                |                           |     |
| <i>Fetal and/or neonatal complications</i> |                      |                           |     |
| Total events                               | 5 (10)               | 1 (3)                     | .38 |
| Preterm birth (< 37 wks gestation)         | 4 (8) <sup>a</sup>   |                           |     |
| Low birthweight (less than 2500 g)         |                      | 1 (3) <sup>b</sup>        |     |
| Very low birthweight (less than 1500 g)    | 1 (2)                |                           |     |

Each pregnancy corresponded to a single woman.

<sup>a</sup> In 2 cases due to heart failure symptoms and in 2 due to fetal causes.

<sup>b</sup> Patient also had pre-eclampsia.

**Table 3 of the supplementary data**

Characteristics of healthy carriers prior to the first pregnancy according to the diagnosis of DCM during follow-up

|                                                     | DCM occurrence after pregnancy |             | P   |
|-----------------------------------------------------|--------------------------------|-------------|-----|
|                                                     | Yes (n = 6)                    | No (n = 12) |     |
| <i>Age at first delivery, y</i>                     | 27 ± 2.7                       | 29 ± 3.6    | .32 |
| <i>Pregnancies* - (mean [range])</i>                | 1.8 [1-4]                      | 1.8 [1-4]   | .96 |
| <i>TTNtv</i>                                        | 3 (50)                         | 6 (50)      | 1   |
| <i>LVEF at first evaluation, %</i>                  | 57 ± 4.6                       | 59 ± 8.3    | .74 |
| <i>LVEDD at first evaluation, mm</i>                | 49 ± 5.2                       | 47 ± 3.2    | .42 |
| <i>Cardiac adverse event before first pregnancy</i> | 4 (67)                         | 0           | .06 |
| <i>Treatment withdrawal</i>                         | 5 (83)                         | 3 (50)      | .54 |

\* Spontaneous abortions were not included in the total number of pregnancies.

**Table 4 of the supplementary data**

Dilated cardiomyopathy causing genes included in genetic analyses

|                                                                                                                                                                                                                                                                                                                          |
|--------------------------------------------------------------------------------------------------------------------------------------------------------------------------------------------------------------------------------------------------------------------------------------------------------------------------|
| <p>ABCC9, ACTC1, ALMS1, ANKRD1, BAG3, CAV3, CRYAB, CSRP3, DES, DMD, DNAJC19, DSG2, DSP, DTNA, EMD, EYA4, FKRP, FKTN, FXN, HADHA, HFE, ILK, LAMA2, LAMA4, LAMP2, LDB3, LMNA, MYBPC3, MYH6, MYH7, NEXN, PDLIM3, PLN, RBM20, SCN5A, SDHA, SGCB, SGCD, SGCG, TAZ, TBX20, TCAP, TMPO, TNNC1, TNNI3, TNNT2, TPM1, TTN, VCL</p> |
|--------------------------------------------------------------------------------------------------------------------------------------------------------------------------------------------------------------------------------------------------------------------------------------------------------------------------|

**List of countries participating in this cohort:**

**European countries:** Spain, Poland, Czech Republic, United Kingdom, Italy, Romania, Netherlands, Denmark

**Oceania:** Australia

**Additional investigators from participating centers:**

**Unit for Screening Studies in Inherited Cardiovascular Diseases. National Institute of Cardiology, Warsaw**

Zofia Bilinska, MD, PhD

**Department of Medical Genetics, Warsaw Medical University**

Prof. Rafal Ploski, MD, PhD

**Institute of Cardiovascular Science, University College London, Gower St, London WC1E 6BT, UK.**

**St. Bartholomew's Hospital, Barts Heart Centre, Barts Health NHS Trust, Whitechapel Rd, London E1 1BB, UK**

Professor Perry Elliott

**Centre for Heart Muscle Disease, Institute of Cardiovascular Science, University College London, London, United Kingdom**

Petros Syrris, MD, PhD

**University College London and Barts Heart Centre, London, UK**

Douglas Ewan Cannie, MD
